# Supplementary material for: Overexpression of long noncoding RNA DUXAP8 inhibits ER-phagy through activating AKT/mTOR signaling and contributes to preeclampsia
Source: PubMed Central journal article supplement — Cell Mol Life Sci. 2024 Aug 9;81(1):336. doi: 10.1007/s00018-024-05385-y (PMC11335266; doi:10.1007/s00018-024-05385-y), 2024-08-09
Supplement: 18_2024_5385_MOESM3_ESM.pdf [file 18_2024_5385_MOESM3_ESM.pdf]

Actin

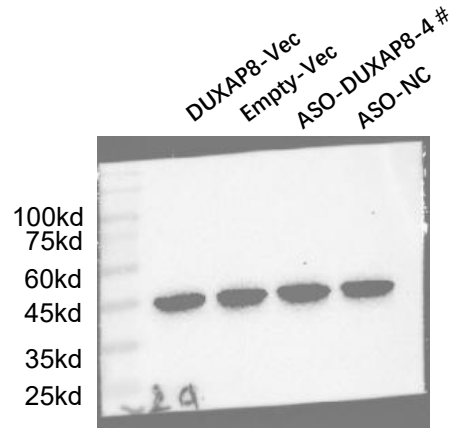

AKT

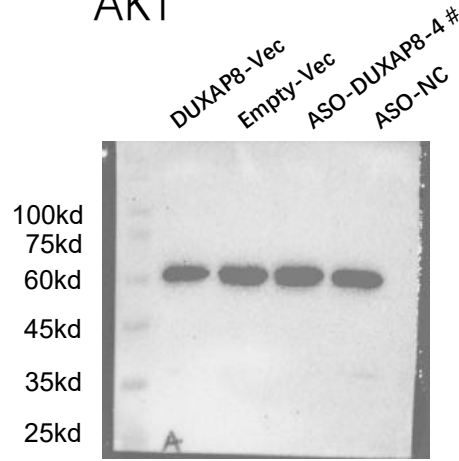

P-AKT-473

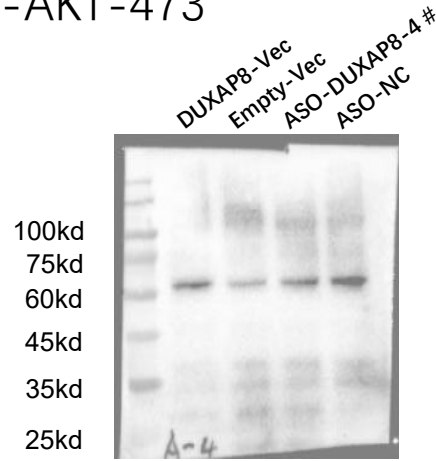

p-mTOR

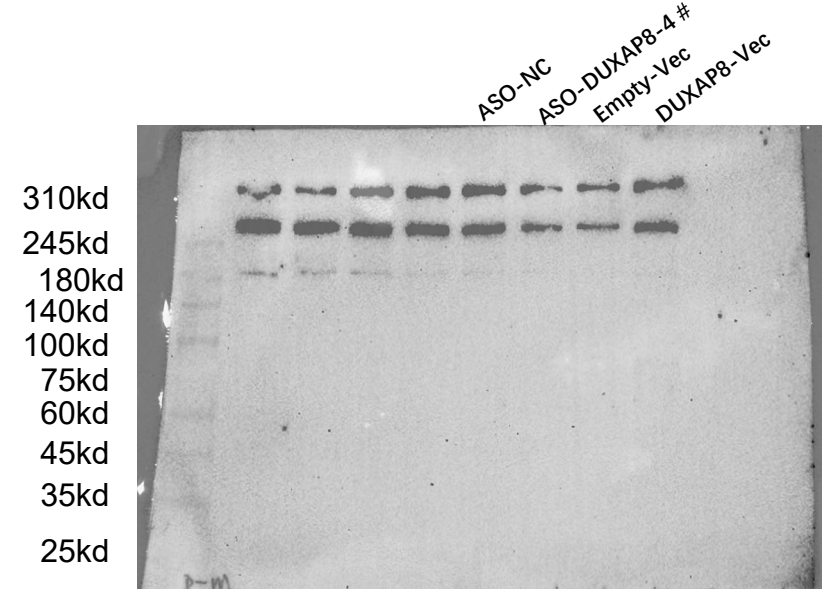

mTOR

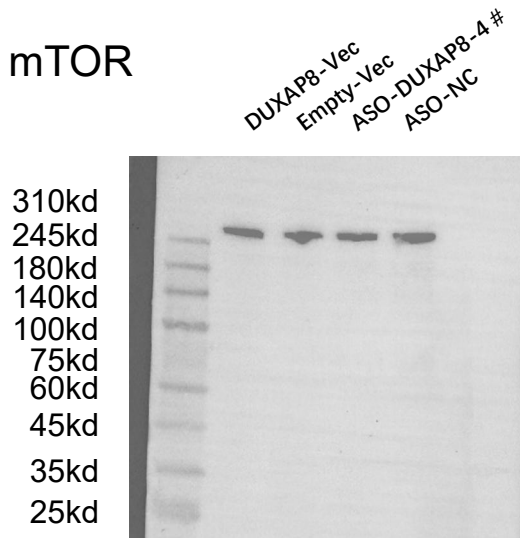

DUXAP8-Vec  
Empty-Vec  
ASO-DUXAP8-4 #  
ASO-NC  
DUXAP8-Vec  
Empty-Vec  
ASO-DUXAP8-4 #  
ASO-NC

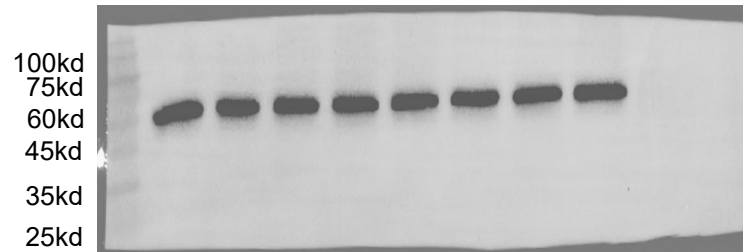

P62

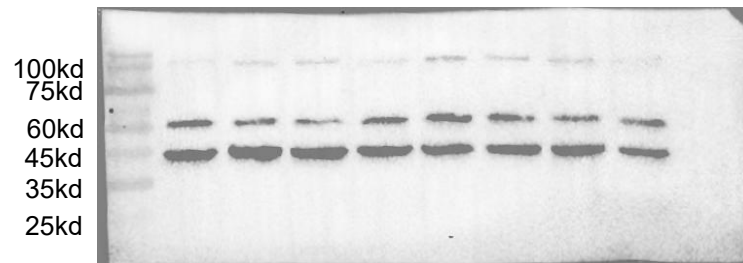

Beclin-1

ASO-NC  
ASO-DUXAP8-4 #  
Empty-Vec  
DUXAP8-Vec

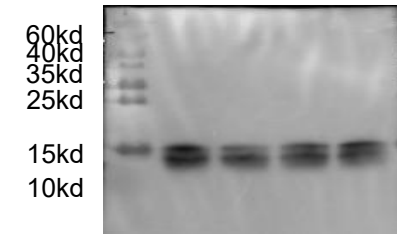

LC3

**HTR8/SVneo**

### P-AKT-473

100kd  
75kd  
60kd  
45kd  
35kd  
25kd

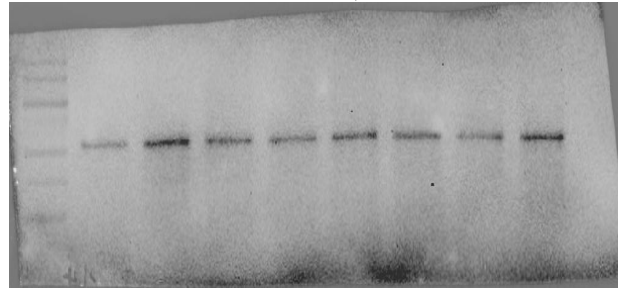

### AKT

100kd  
75kd  
60kd  
45kd  
35kd  
25kd

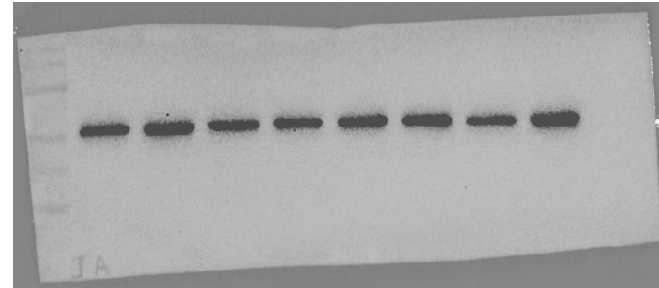

### ACTIN

100kd  
75kd  
60kd  
45kd  
35kd  
25kd

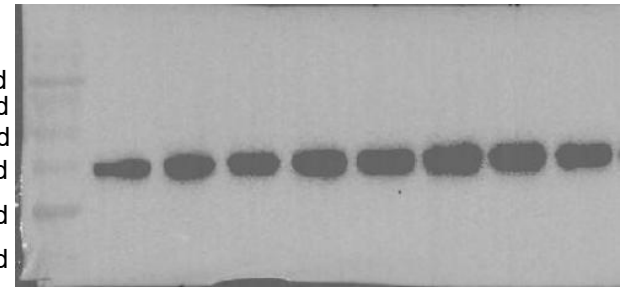

### P-mTOR-2448

310kd  
245kd  
180kd  
140kd  
100kd  
75kd  
60kd  
45kd

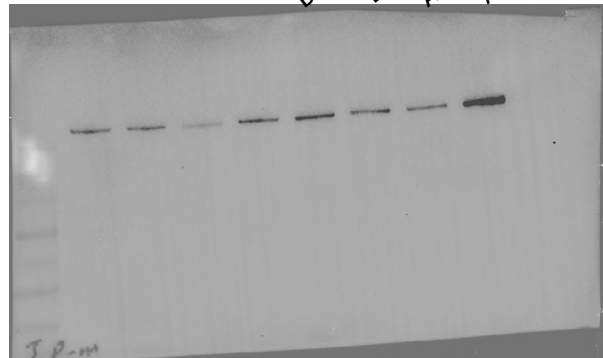

### mTOR

310kd  
245kd  
180kd  
140kd  
100kd  
75kd  
60kd  
45kd

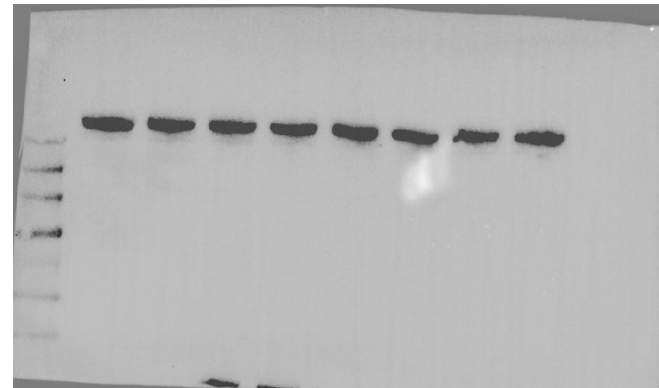

60kd  
40kd  
35kd  
25kd  
15kd  
10kd

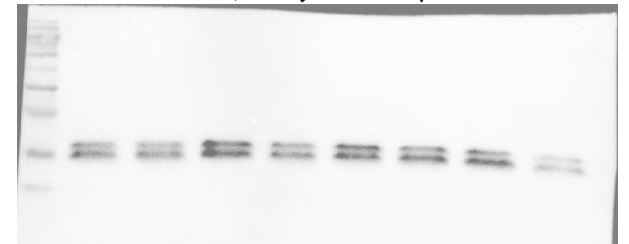

LC3

100kd  
75kd  
60kd  
45kd  
35kd

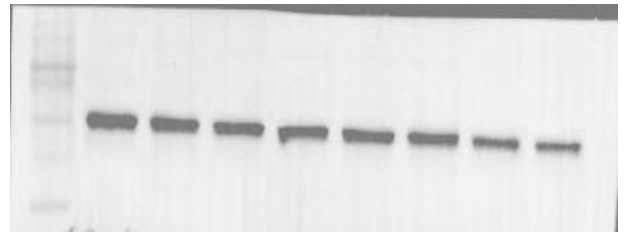

Beclin-1

### P62

100kd  
75kd  
60kd  
45kd  
35kd  
25kd

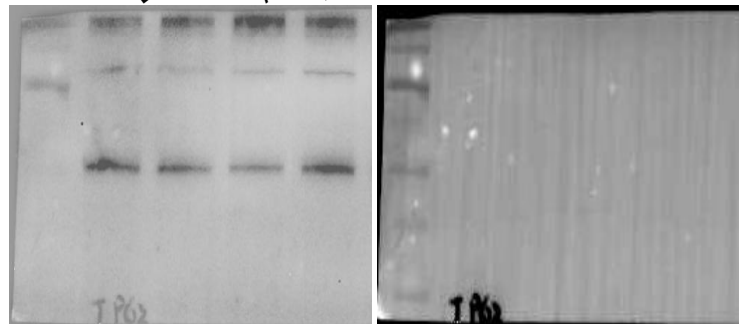

JAR

PCBP2

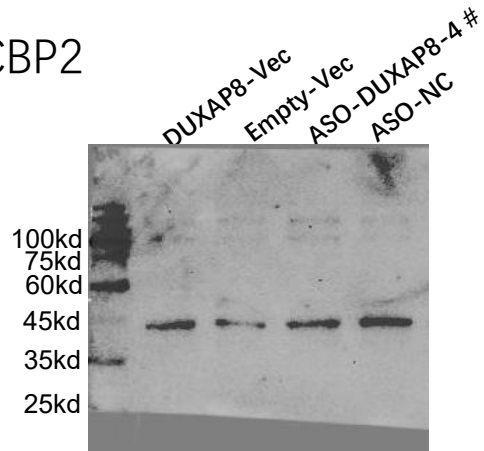

Empty-Vec +si-NC  
DUXAP8-vector+ si-NC  
DUXAP8-Vec +PCBP2 siRNA 2  
DUXAP8-Vec +PCBP2 siRNA 3

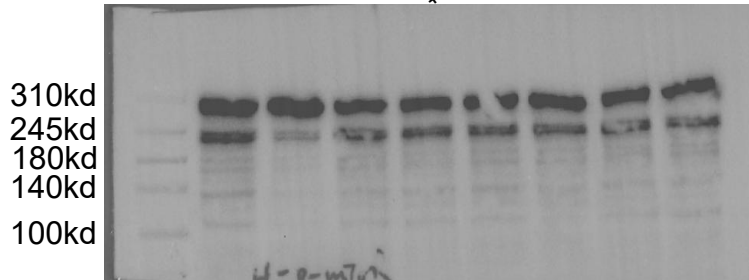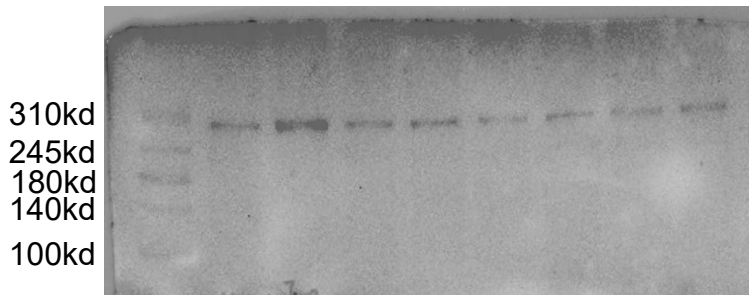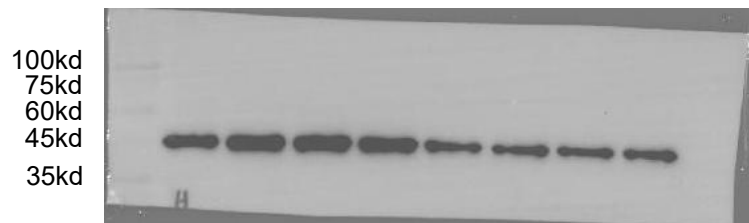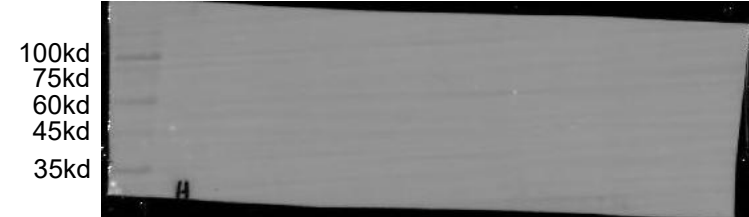

AKT

Empty-Vec +si-NC  
DUXAP8-vector+ si-NC  
DUXAP8-Vec +PCBP2 siRNA 2  
DUXAP8-Vec +PCBP2 siRNA 3

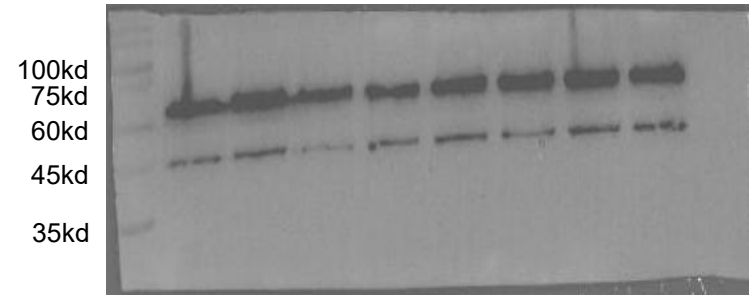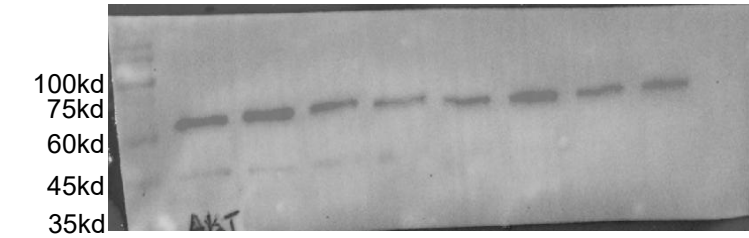

HTR8/SVneo

PCBP2

100kd  
75kd  
60kd  
45kd  
35kd

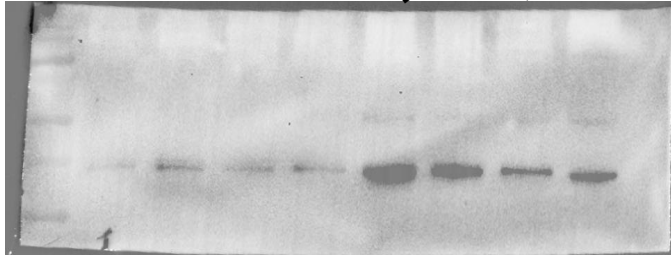

β-actin

100kd  
75kd  
60kd  
45kd  
35kd

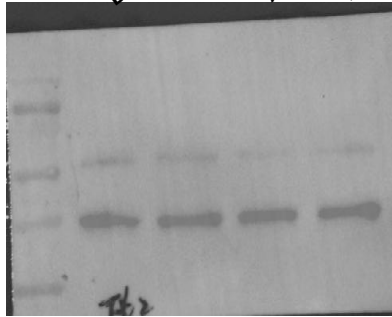

Empty-Vec +si-NC  
DUXAP8-vector+ si-NC  
DUXAP8-Vec  
+PCBP2 siRNA 2  
DUXAP8-Vec  
+PCBP2 siRNA 3

310kd  
245kd  
180kd  
140kd  
100kd

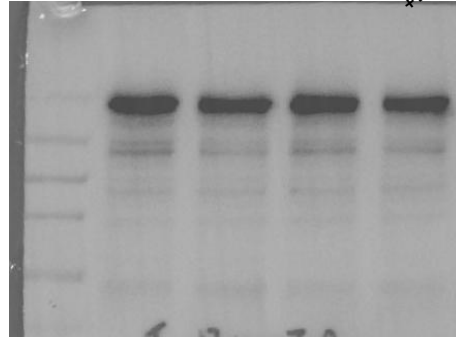

mTOR

310kd  
245kd  
180kd  
140kd  
100kd  
75kd

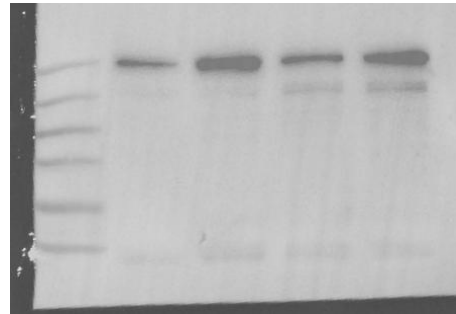

P-mTOR

Empty-Vec +si-NC  
DUXAP8-vector+ si-NC  
DUXAP8-Vec  
+PCBP2 siRNA 2  
DUXAP8-Vec  
+PCBP2 siRNA 3

100kd  
75kd  
60kd  
45kd  
35kd

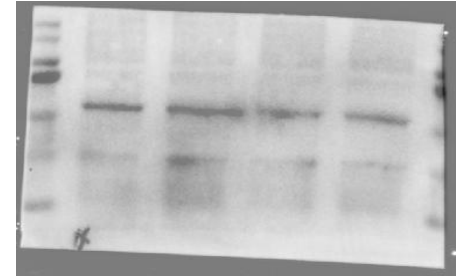

P-AKT-473

100kd  
75kd  
60kd  
45kd  
35kd

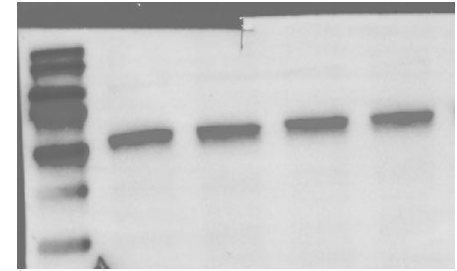

AKT

100kd  
75kd  
60kd  
45kd  
35kd

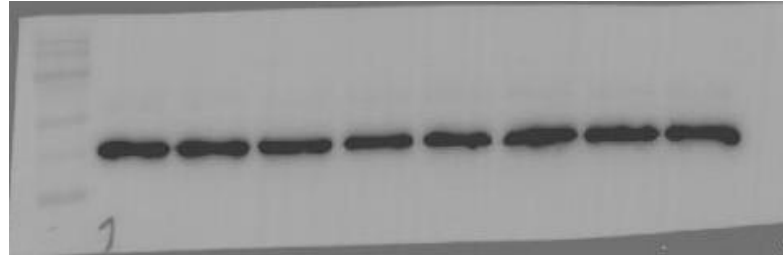

β-actin

JAR



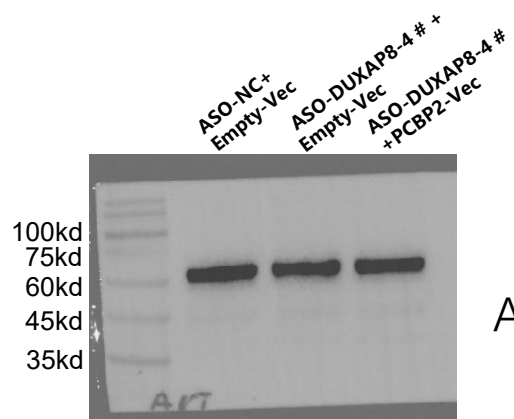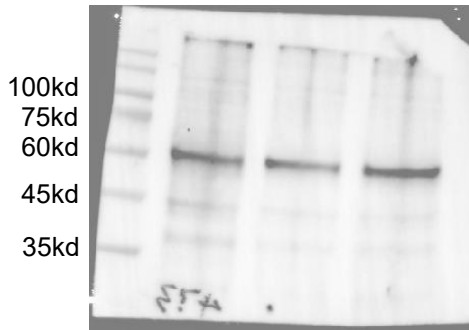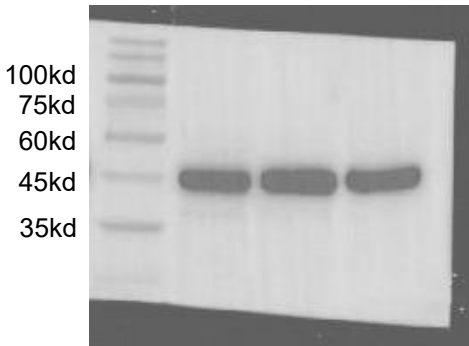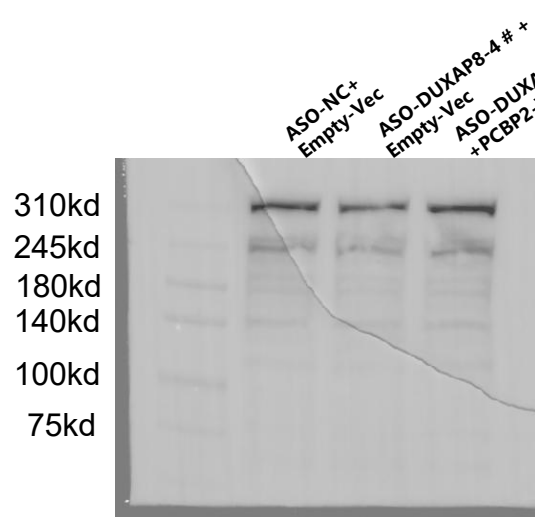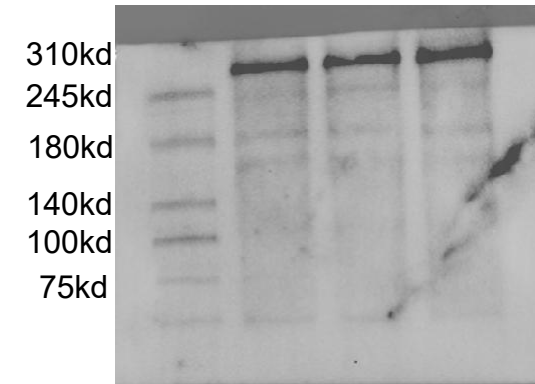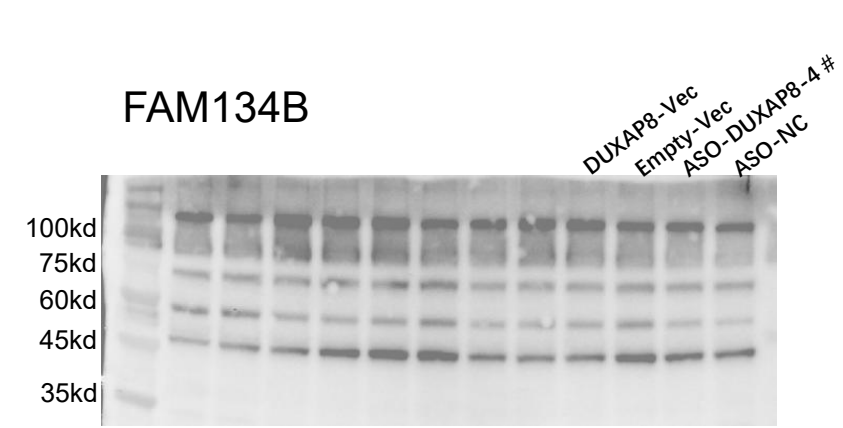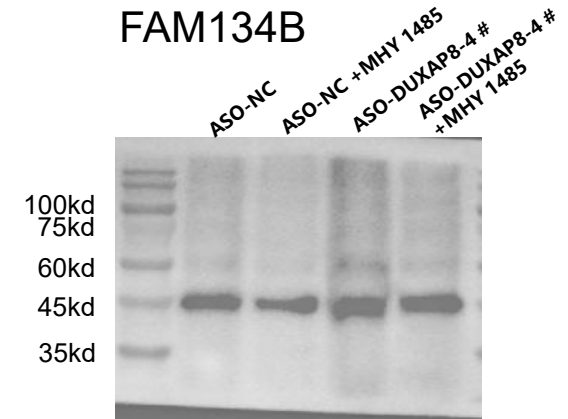

**HTR8/SVneo**

ASO-NC+  
Empty-Vec  
ASO-DUXAP8-4 # +  
Empty-Vec  
ASO-DUXAP8-4 #  
+PCBP2-Vec

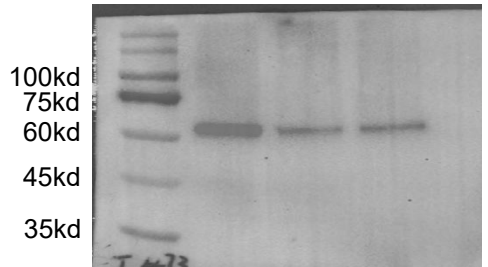

P-AKT-473

ASO-NC+  
Empty-Vec  
ASO-DUXAP8-4 # +  
Empty-Vec  
ASO-DUXAP8-4 #  
+PCBP2-Vec

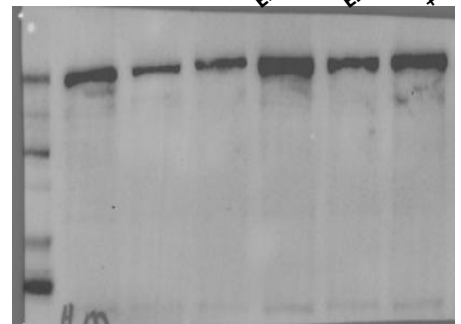

P-mTOR

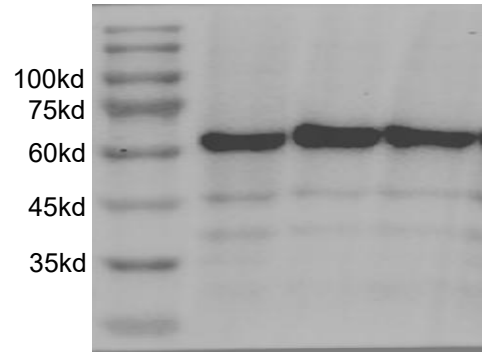

AKT

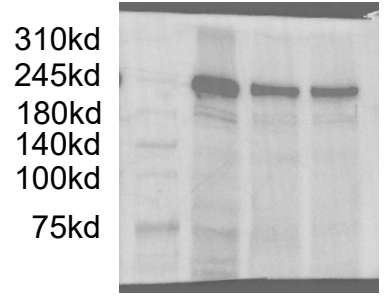

mTOR

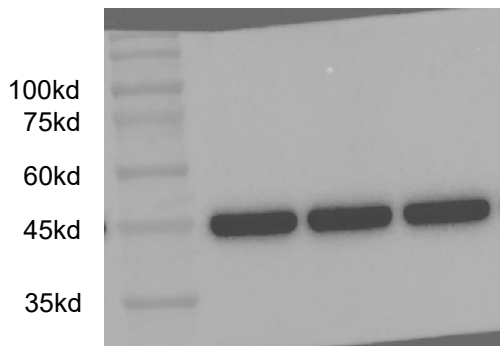

β-actin

FAM134B

DUXAP8-Vec  
Empty-Vec  
ASO-DUXAP8-4 #  
ASO-NC

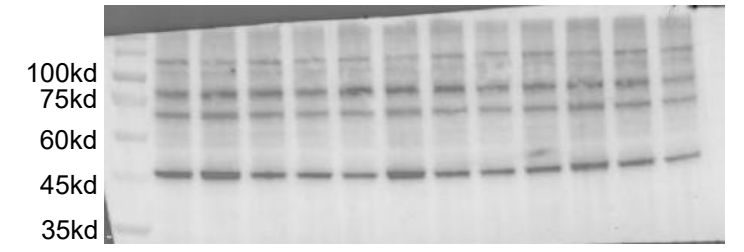

FAM134B

ASO-NC  
ASO-NC +MHY 1485  
ASO-DUXAP8-4 #  
ASO-DUXAP8-4 #  
+MHY 1485

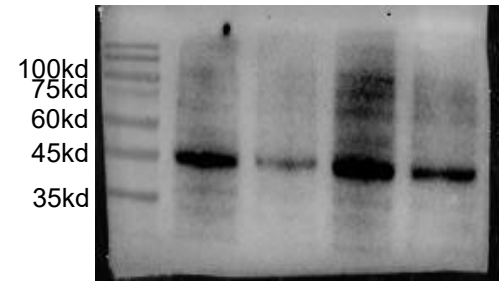

JAR

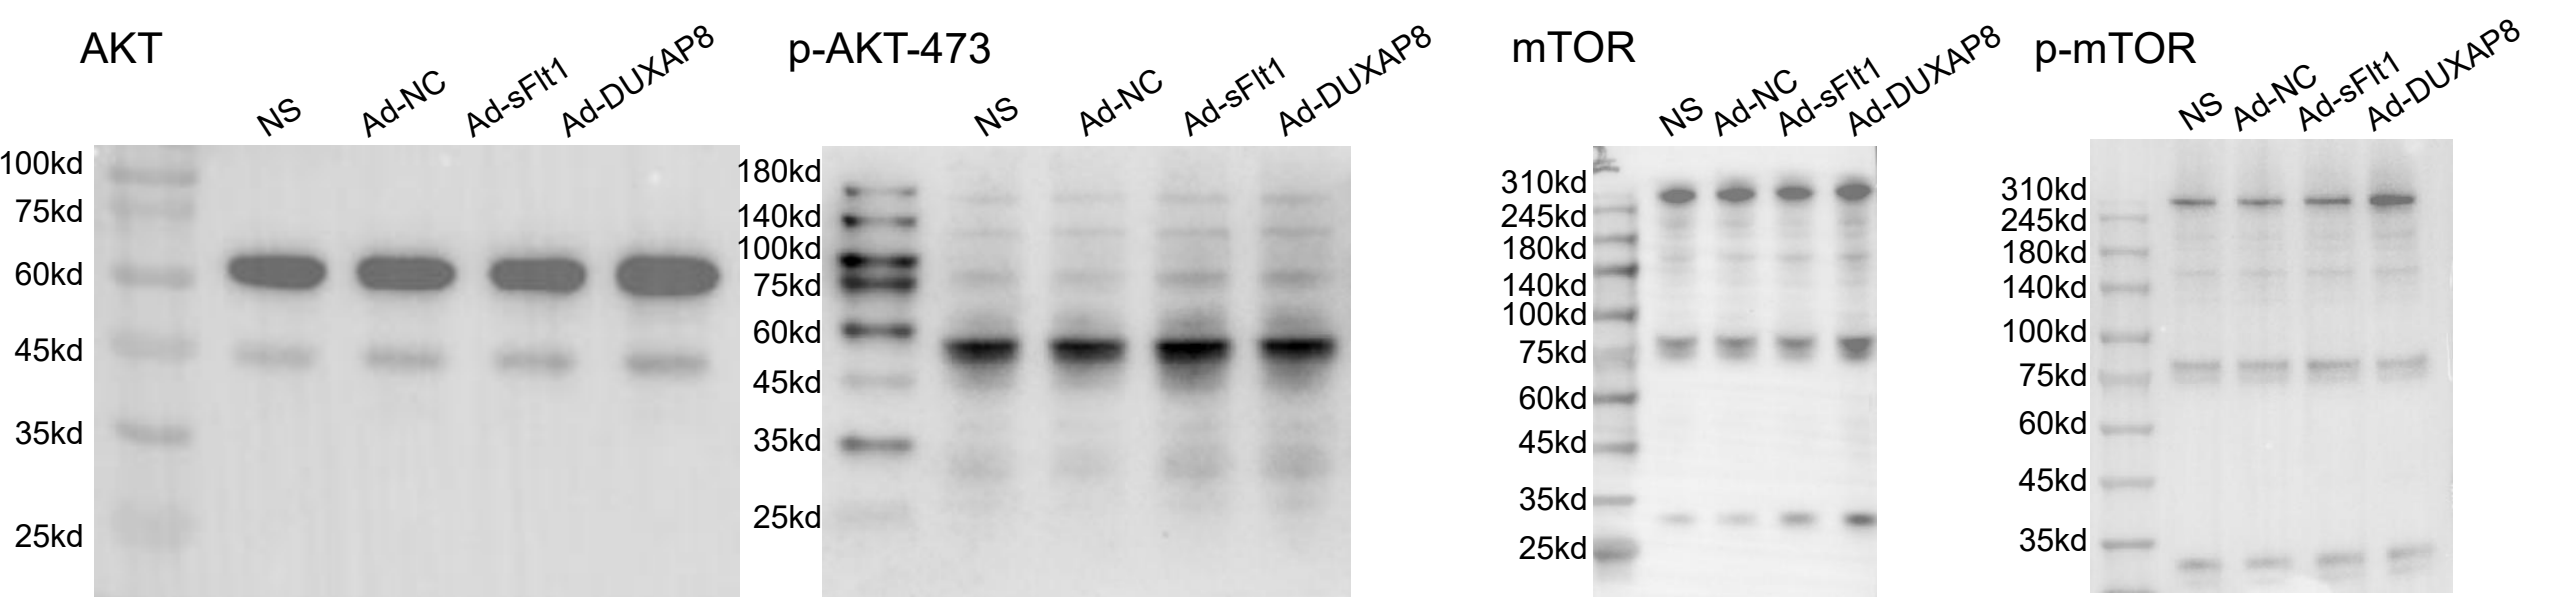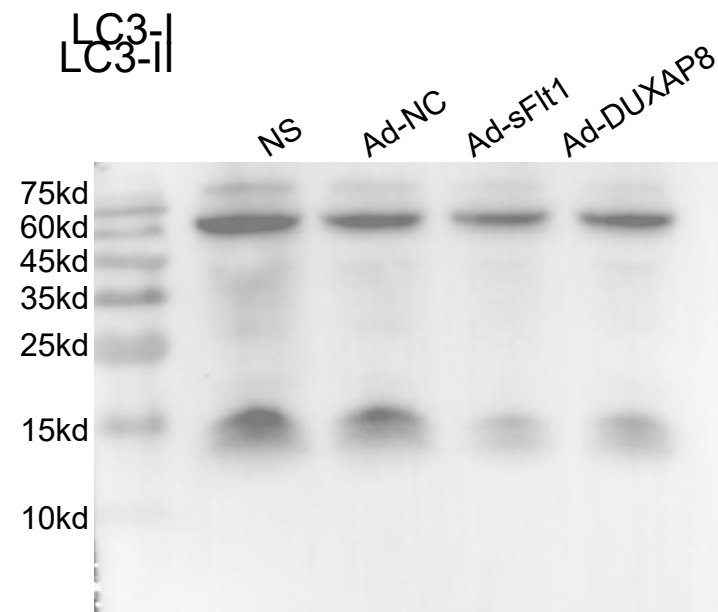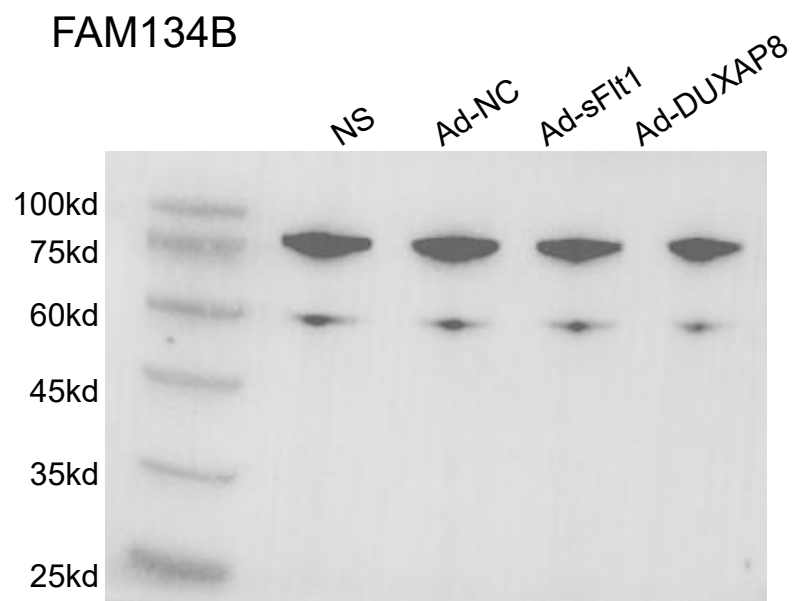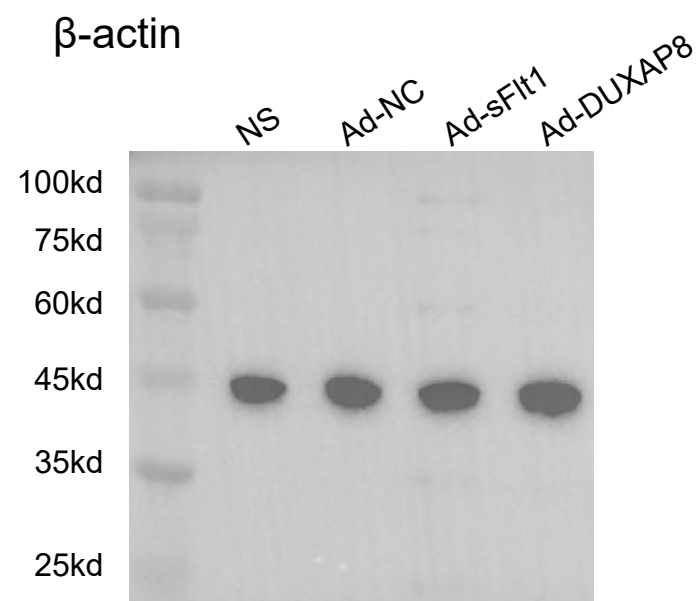

**Animal**

AKT

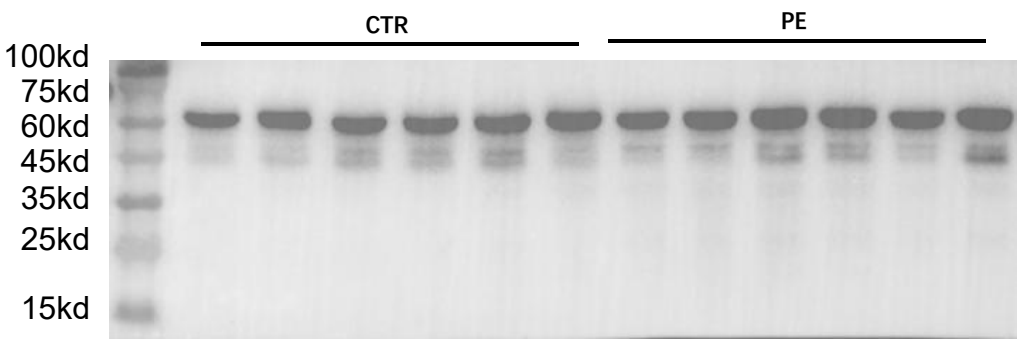

p-AKT-473

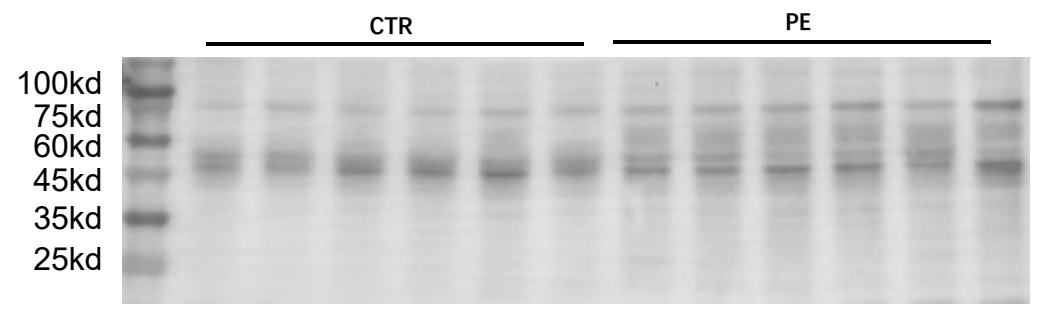

mTOR

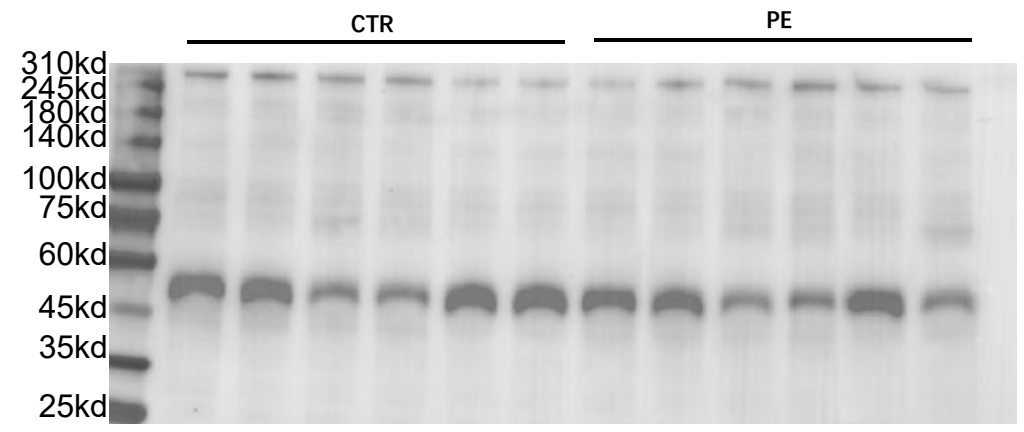

p-mTOR

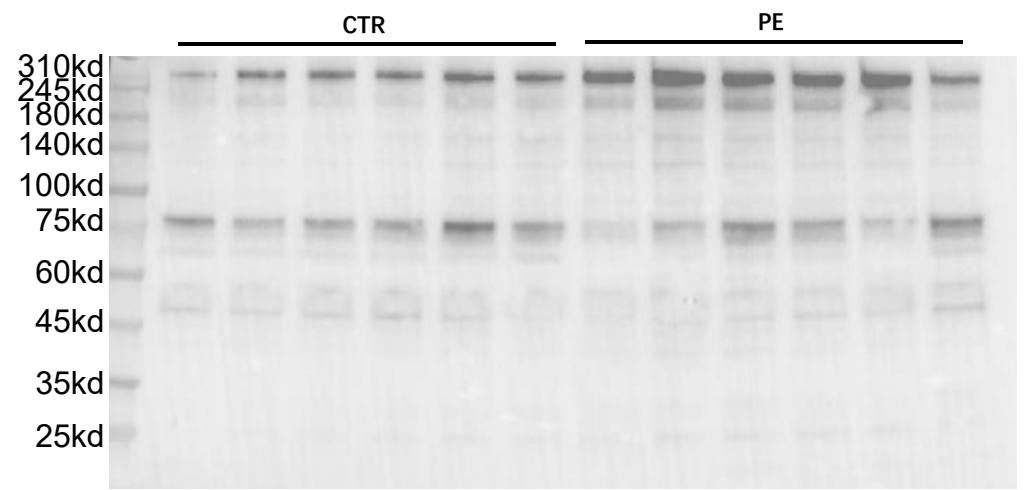

**Placentae**



LC3

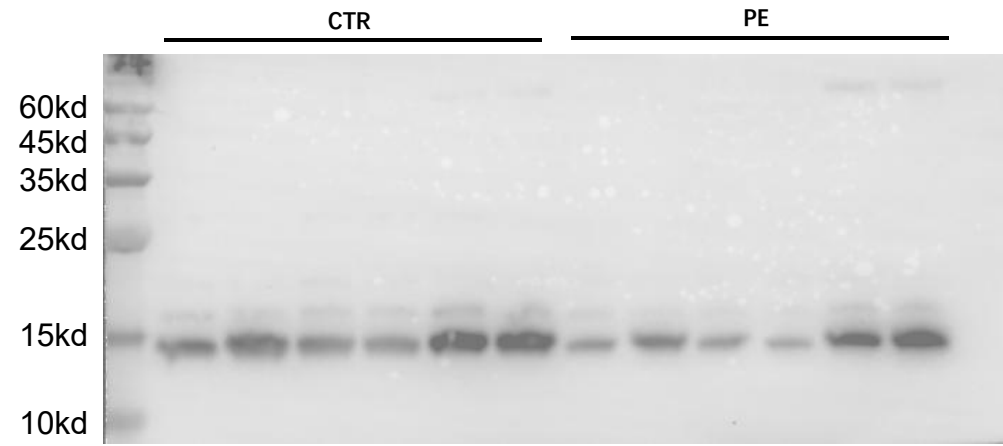

$\beta$ -actin

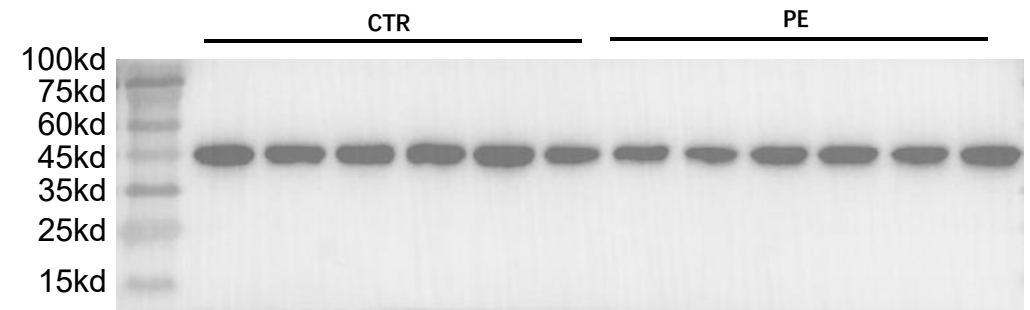

FAM134B

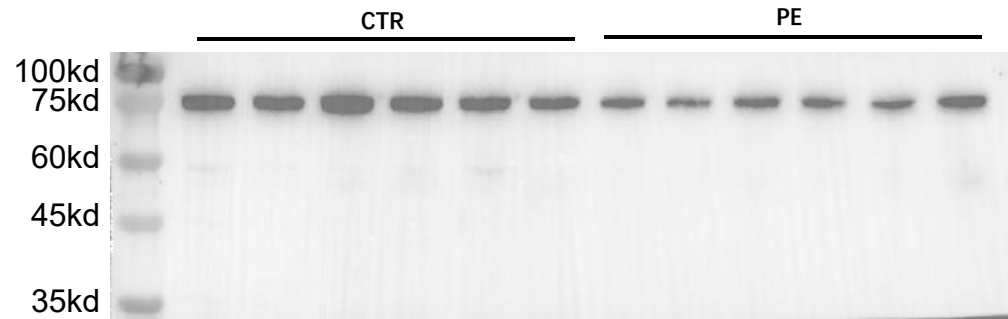

PCBP2

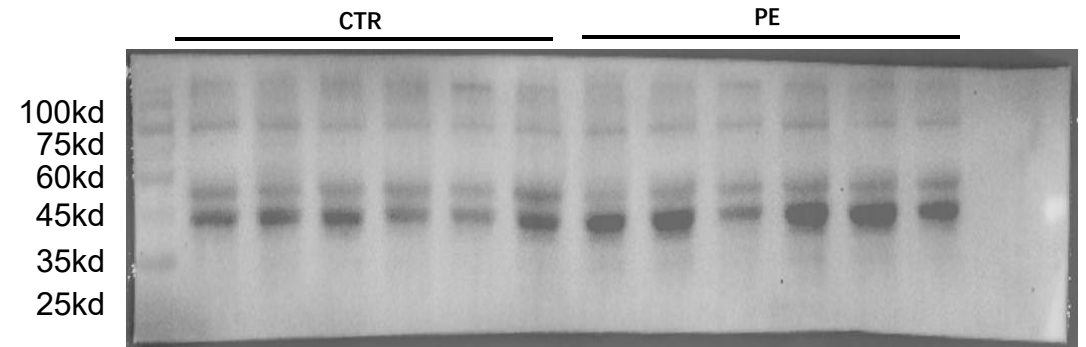

**Placentae**
